# Supplementary material for: Single-ion dominantly conducting polyborates towards high performance electrolytes in lithium batteries
Source: Royal Society of Chemistry journal article supplement (doi:10.1039/c5ta00216h), 2015-01-01
Supplement: c5ta00216h1.pdf [file c5ta00216h1.pdf]

## Electronic Supplementary Information

### Single-ion dominantly conducting polyborates towards high performance electrolytes in lithium batteries

Bingsheng Qin<sup>a,b</sup>, Zhihong Liu<sup>\*b</sup>, Jie Zheng<sup>b</sup>, Pu Hu<sup>b</sup>, Guoliang Ding<sup>b</sup>, Chuanjian Zhang<sup>b</sup>, Jianghui Zhao<sup>b</sup>, Desheng Kong<sup>\*a</sup>, Guanglei Cui<sup>\*b</sup>

<sup>a</sup> Shandong Province Key Laboratory of Life-Organic Analysis, School of Chemistry and Chemical Engineering, Qufu Normal University, Qufu Normal University, Qufu, 273165, China

<sup>b</sup> Qingdao Key Laboratory of solar energy & energy storage, Qingdao Institute of Bioenergy and Bioprocess Technology, Chinese Academy of Sciences, Qingdao 266101, China

\*Corresponding author. Tel: 86-532-80662746, Fax: 86-532-80662744.  
E-mail: liuzh@qibebt.ac.cn, kongdscn@eyou.com, cuigl@qibebt.ac.cn.

### Table of Contents

|                                                                                                                                            |    |
|--------------------------------------------------------------------------------------------------------------------------------------------|----|
| <sup>1</sup> H NMR spectra of pentaerythrite, di(trimethylolpropane), PLPB and PLDB in DMSO-d <sub>6</sub> .....                           | P2 |
| XRD patterns and typical SEM images of PLPB and PLDB.....                                                                                  | P3 |
| The molecular mass per unit of the polymeric lithium salt synthesized in recent years.....                                                 | P4 |
| Stress-strain curves for PLPB@PVDF-HFP and PLDB@PVDF-HFP membranes...                                                                      | P5 |
| AC impedance of Li/GPEs/Li cells before and after polarized with a potential difference of 10 mV at room temperature.....                  | P6 |
| Cycling performance and charge-discharge profiles of the Li/ PC swollen PLPB@PVDF-HFP /LiFePO <sub>4</sub> batteries at 120°C.....         | P7 |
| Charge and discharge profiles of the Li//EC/DMC swollen PLDB@PVDF-HFP//LiNi <sub>0.5</sub> Mn <sub>1.5</sub> O <sub>4</sub> batteries..... | P8 |

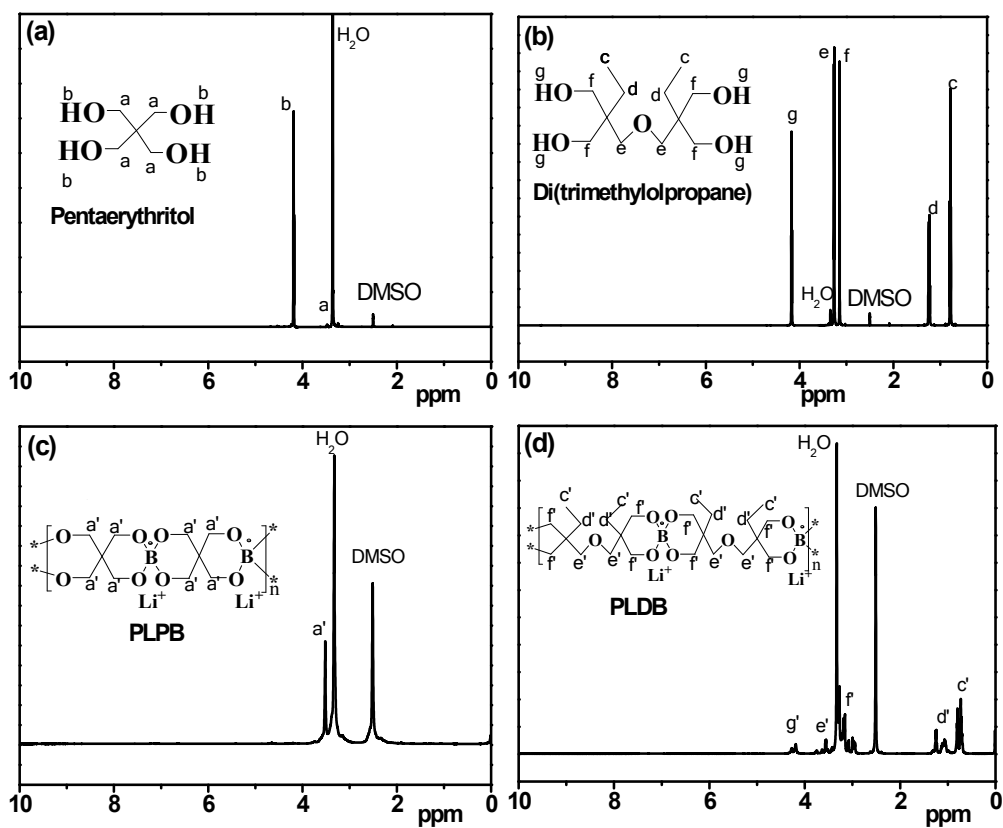

Fig. S1  $^1\text{H}$  NMR spectra of pentaerythritol(a), di(trimethylolpropane) (b), PLPB(c) and PLDB (d) in  $\text{DMSO-d}_6$ .

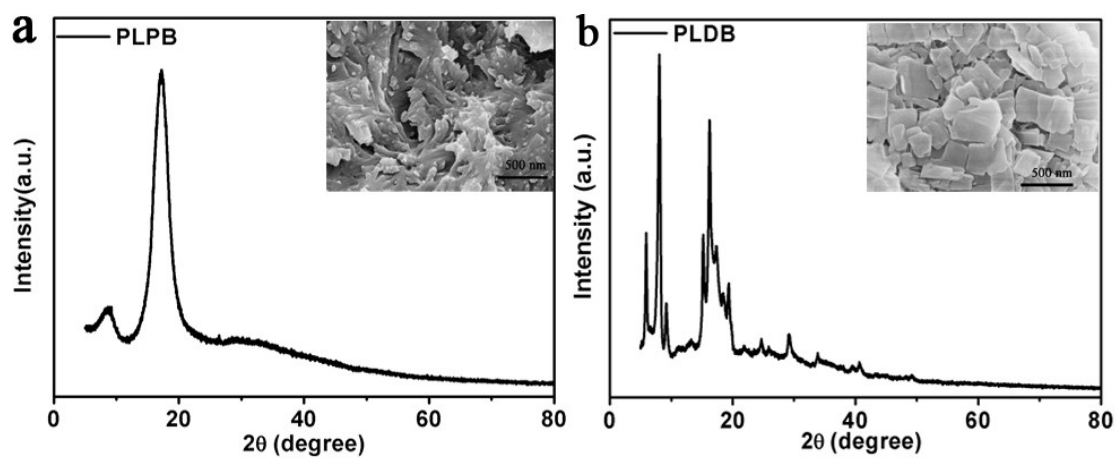

Fig. S2 XRD patterns and typical SEM images of PLPB(a) and PLDB (b).

| Polymeric lithium salts | Chemical structure                                                                  | Molecular weight per repeating unit (g mol <sup>-1</sup> ) | References |
|-------------------------|-------------------------------------------------------------------------------------|------------------------------------------------------------|------------|
| PLTB                    | 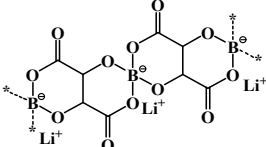   | 164                                                        | Ref. 1     |
| PPAB                    |    | 268                                                        | Ref. 2     |
| LiPVAOB                 |    | >178                                                       | Ref. 3     |
| LiPAAOB                 |   | >234                                                       | Ref. 4     |
| PLPB                    |  | 150                                                        |            |

Table. S1 The molecular mass per unit of the polymeric lithium salt synthesized in recent years.

## References

- 1 X. Wang, Z. Liu, C. Zhang, Q. Kong, J. Yao, P. Han, W. Jiang, H. Xu and G. Cui, *Electrochim. Acta*, 2013, **92**, 132-138.
- 2 Y. Zhang, G. Xu, Y. Sun, B. Han, T. B. W. T, Z. Chen, R. Rohan and H. Cheng, *RSC Adv.*, 2013, **3**, 14934-14937.
- 3 Y. S. Zhu, X. J. Wang, Y. Y. Hou, X. W. Gao, L. L. Liu, Y. P. Wu and M. Shimizu, *Electrochim. Acta*, 2013, **87**, 113-118.
- 4 Y. S. Zhu, X. W. Gao, X. J. Wang, Y. Y. Hou, L. L. Liu and Y. P. Wu, *Electrochem. Commun.*, 2012, **22**, 29-32.

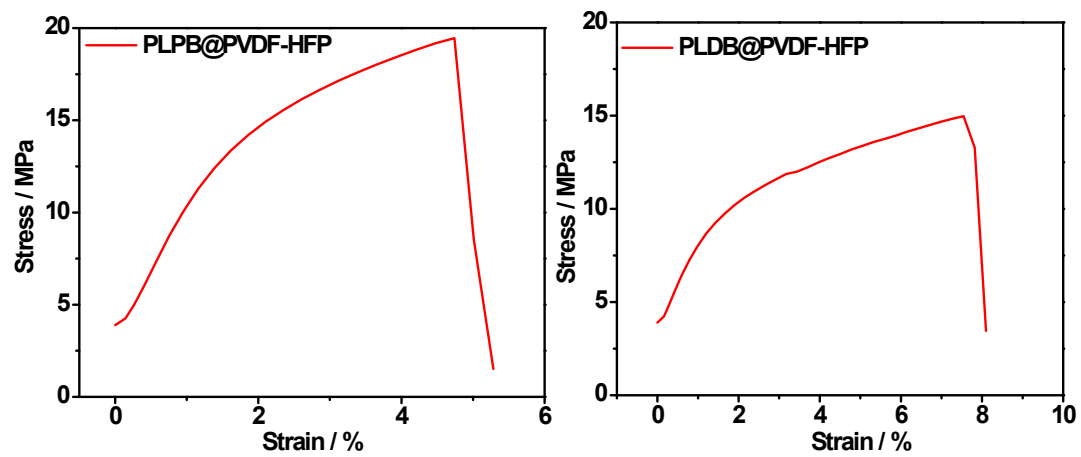

Fig. S3 Stress-strain curves for PLPB@PVDF-HFP and PLDB@PVDF-HFP, respectively.

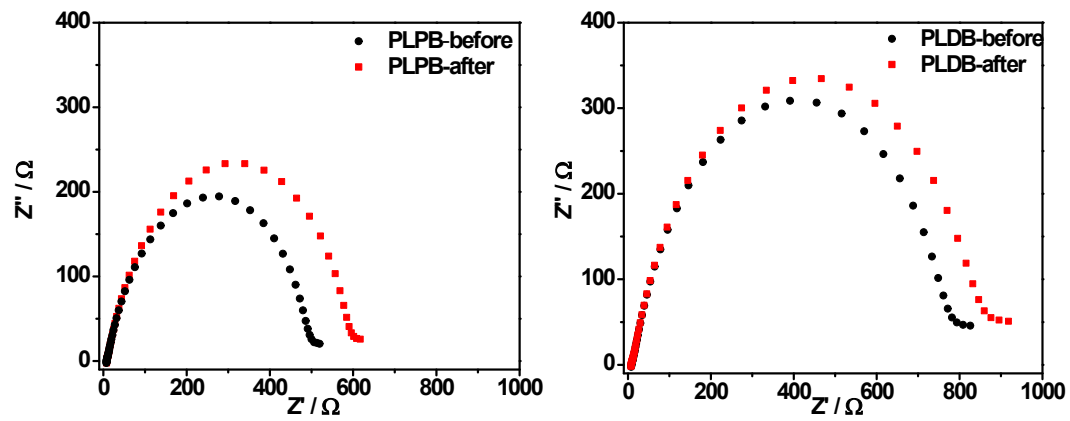

Fig. S4 AC impedance of Li/EC/DMC-PLPB@PVDF-HFP/Li cell (left) and Li/EC/DMC-PLDB@PVDF-HFP/Li cell (right) before and after polarized with a potential difference of 10 mV at room temperature.

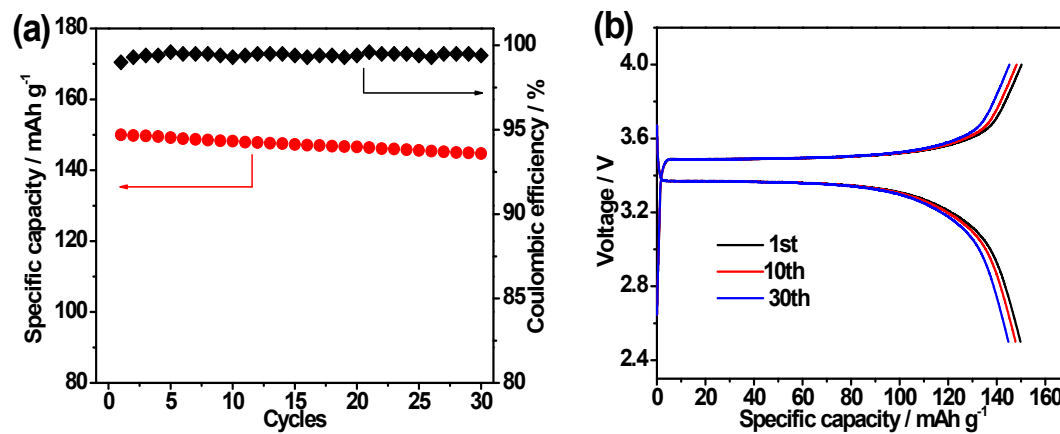

Fig. S5 Cycling performance of the Li/ PC swollen PLPB@PVDF-HFP /LiFePO<sub>4</sub> batteries at 120°C (a), charge and discharge profiles of the Li/ PC swollen PLPB@PVDF-HFP /LiFePO<sub>4</sub> batteries at 120°C (b).

The Li//EC/DMC-PLDB@PVDF-HFP//LiNi<sub>0.5</sub>Mn<sub>1.5</sub>O<sub>4</sub> half coin cells (2032-type) were assembled by sandwiching the EC/DMC swollen PLDB@PVDF-HFP membrane between lithium metal foil and LiNi<sub>0.5</sub>Mn<sub>1.5</sub>O<sub>4</sub> electrode. The LiNi<sub>0.5</sub>Mn<sub>1.5</sub>O<sub>4</sub> electrode was composed of 80 wt. % LiNi<sub>0.5</sub>Mn<sub>1.5</sub>O<sub>4</sub>, 10 wt. % PVDF and 10 wt. % carbon black. All assembly of cells was carried out in an argon-filled glove box. After cell assembly, the cells were laid down on one side for 12 h and then on the other side for another 12 h to impregnate the porous composite electrodes and their interfaces with electrolyte. The charge/discharge performance was recorded on a LAND battery test system. The galvanostatic charge/discharge behavior of Li//EC/DMC-PLDB@PVDF-HFP//LiNi<sub>0.5</sub>Mn<sub>1.5</sub>O<sub>4</sub> cells were conducted at 0.1C over the range of 3.5–5.0 V.

The original charge-discharge voltage profiles of the LiNi<sub>0.5</sub>Mn<sub>1.5</sub>O<sub>4</sub>/Li batteries employing EC/DMC-PLDB@PVDF-HFP as electrolyte at room temperature was shown in Fig. S6. As depicted in Fig. S6, the EC/DMC-PLDB@PVDF-HFP based Li/LiNi<sub>0.5</sub>Mn<sub>1.5</sub>O<sub>4</sub> cells exhibited stable charge-discharge profiles from the 1<sup>st</sup> cycle to the 20<sup>th</sup> cycle. The capacity loss in the first 20 cycles was acceptable considering the low charge-discharge current of 0.1C. The coulombic efficiency was about 96%, meaning that some modifications were still needed in further research.

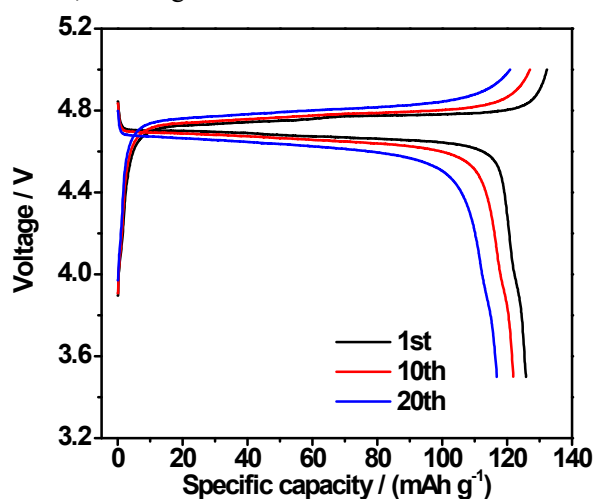

Fig. S6 Charge and discharge profiles of the Li//EC/DMC swollen PLDB@PVDF-HFP//LiNi<sub>0.5</sub>Mn<sub>1.5</sub>O<sub>4</sub> batteries at room temperature.

The electrochemical stability of PLPB and PLDB was measured in a three-electrode setup using



linear sweep voltammetry (LSV). A 200 mg sample of PLPB or PLDB along with 10 mg PVDF-HFP was dispersed in 4 mL DMSO solvent to prepare a homogeneous ink. The mass ratio of lithium salt and PVDF-HFP is as high as 20:1 to ensure that the detected electrochemical signal was mainly from the lithium salts. After that, a 5  $\mu$ L drop of ink was put onto a 0.07 cm<sup>2</sup> glassy-carbon disk electrode and dried at 60°C in a vacuum oven for 12 h to remove the solvent. The PLPB and PLDB coated glassy carbon electrode as well as the pristine glassy carbon electrode (control sample) were used as working electrode, respectively, while lithium sheets were used as counter- and reference electrodes. Herein, 1 M LiPF<sub>6</sub> in EC:DEC (3:7, by wt.) was used as electrolyte owing to its superior electrochemical stability<sup>5</sup>. The measurements were conducted with a scan rate of 1 mV s<sup>-1</sup> through a CHI660C Electrochemical Workstation (Shanghai, China) in the voltage range of 2.0V-6.0 V.

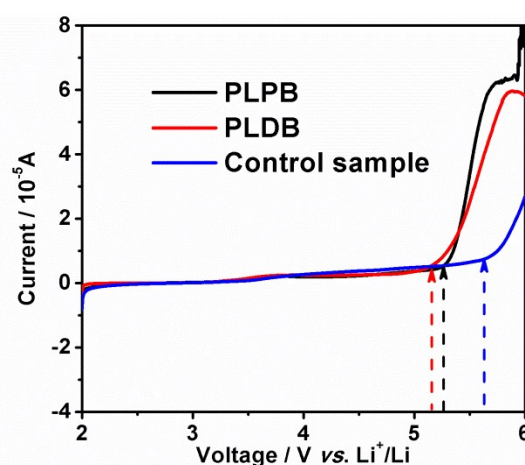

Fig. S7 Linear sweep voltammetry of PLPB, PLDB and control sample measured in a three-electrode setup at a scan rate of 1 mV s<sup>-1</sup>. (electrolyte: 1 M LiPF<sub>6</sub> EC:DEC)

The electrochemical stability of PLPB and PLDB was measured in a three-electrode setup, where the kinetic factors might be minimized. As shown in Fig. S7, the control sample started to decompose at about 5.75 V, which is in good agreement with the electrochemical stability window of 1 M EC:DEC- LiPF<sub>6</sub> reported in Ref. [5]. The limiting potential for PLPB and PLDB was about 5.25 V and 5.15 V respectively, demonstrating the better thermodynamically stability of PLPB than PLDB.

Ref. [5] Pia Janssen et al., *Electrochim. Acta*, 2014, **125**, 101–106.
